# Supplementary material for: Enhanced photocatalytic efficiency of AuPd nanoalloy decorated ZnO-reduced graphene oxide nanocomposites
Source: Royal Society of Chemistry journal article supplement (doi:10.1039/c4ra13245a), 2014-12-23
Supplement: c4ra13245a1.pdf [file c4ra13245a1.pdf]

## Supporting Information

# Enhanced Photocatalytic Efficiency of AuPd Nanoalloy Decorated ZnO-Reduced Graphene Oxide Nanocomposites

Bharati Panigrahy<sup>\*a</sup> and D. D. Sarma<sup>a,b</sup>

<sup>a</sup>Solid State and Structural Chemistry Unit, Indian Institute of Science, Bangalore, India

<sup>b</sup>Council of Scientific and Industrial Research-Network of Institutes for Solar Energy (CSIR-NISE),  
New Delhi, India

### Figures with Captions

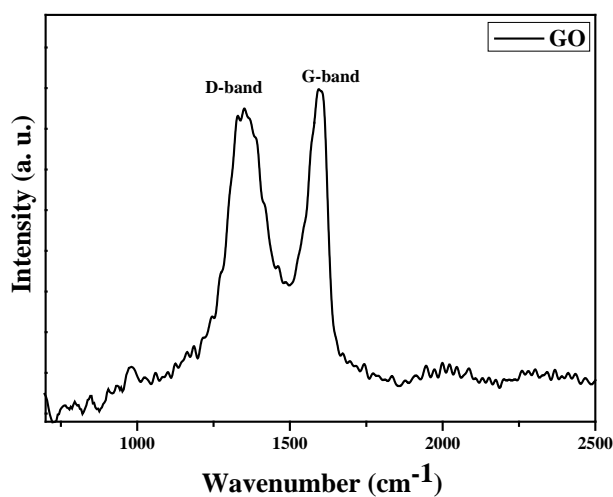

**S1:** Room-temperature micro-Raman spectra of as-prepared graphene oxide sheets.

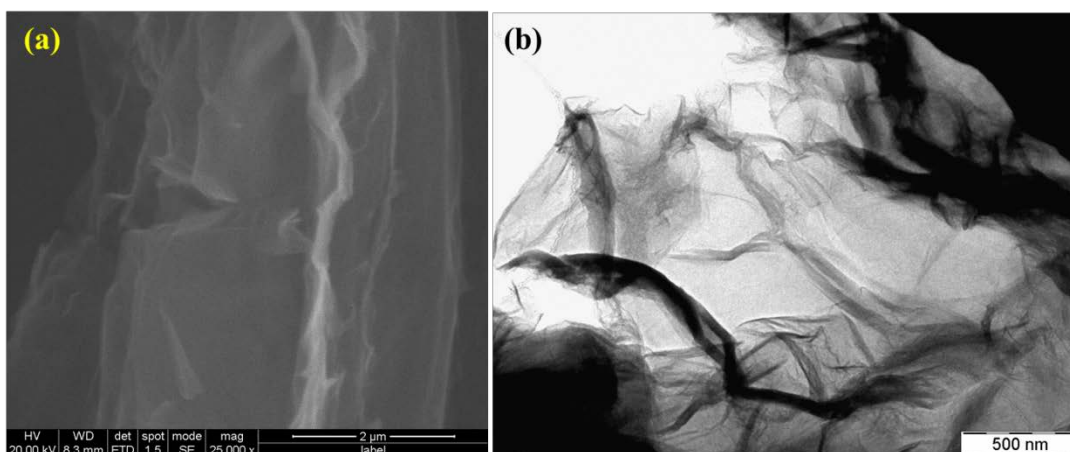

**S2:** (a) SEM and (b) TEM images of RGO sheets.

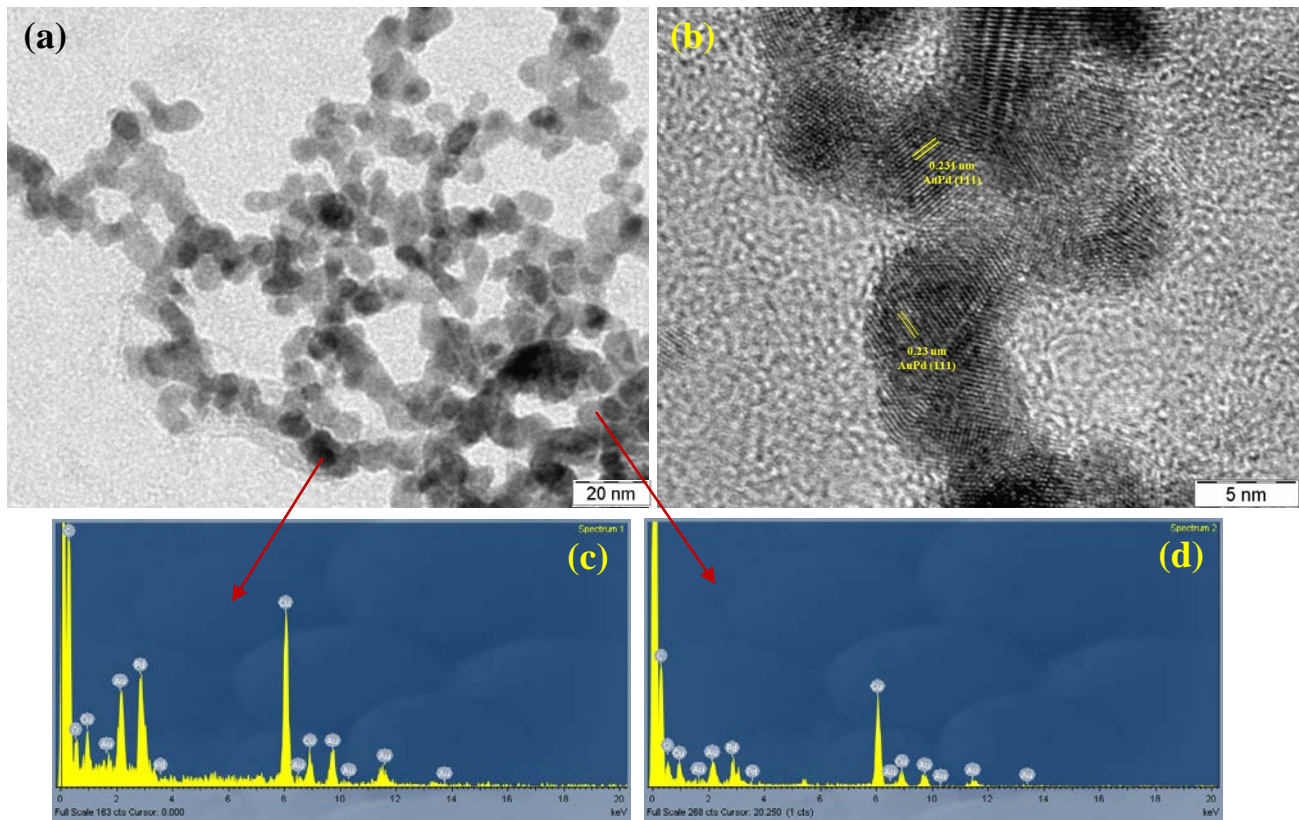

**S3:** (a) TEM, (b) HRTEM images of AuPd nanoalloy. (c) and (d) represent the EDS pattern of AuPd nanoalloy at different position.

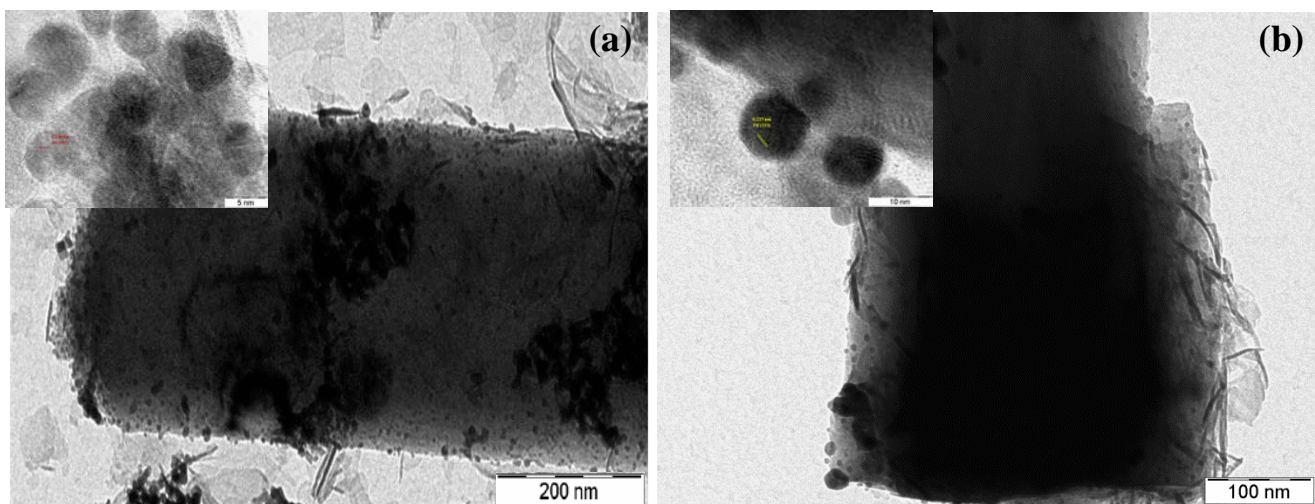

**S4:** TEM images of (a) ZR5-Au and (b) ZR5-Pd hybrid nanostructures with corresponding HRTEM images presented as inset.

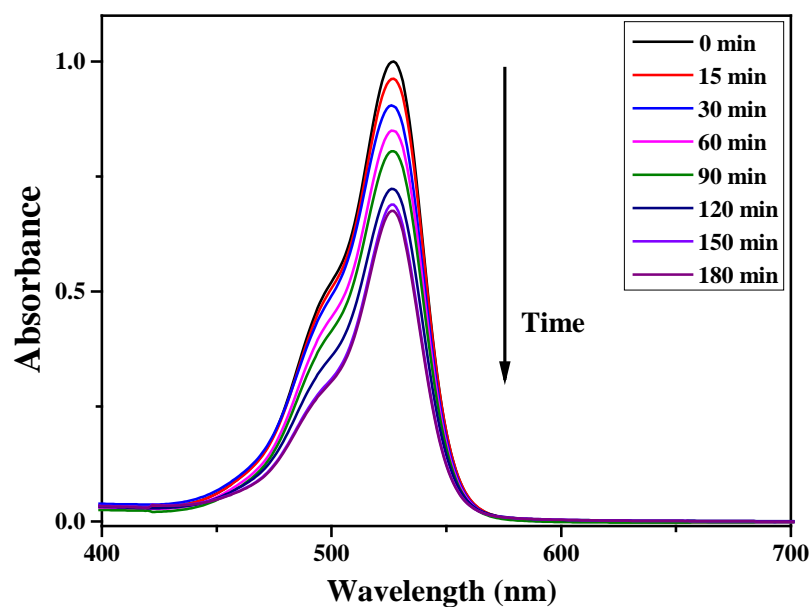

**S5:** Time dependent (UV light irradiation) UV-visible absorption spectra of R6G dye in the presence of ZnO nanorods as photocatalysts.

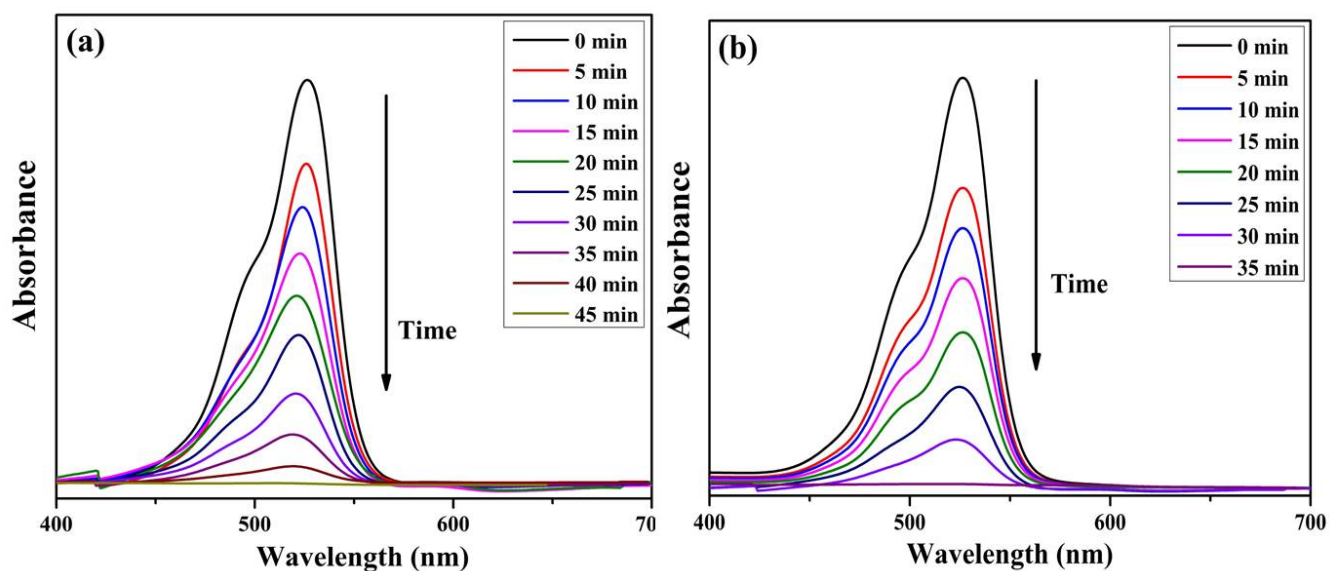

**S6:** Time dependent (UV light irradiation) UV-visible absorption spectra of R6G dye in the presence of (a) ZR5-Au and (b) ZR5-Pd hybrid nanostructures as photocatalysts.

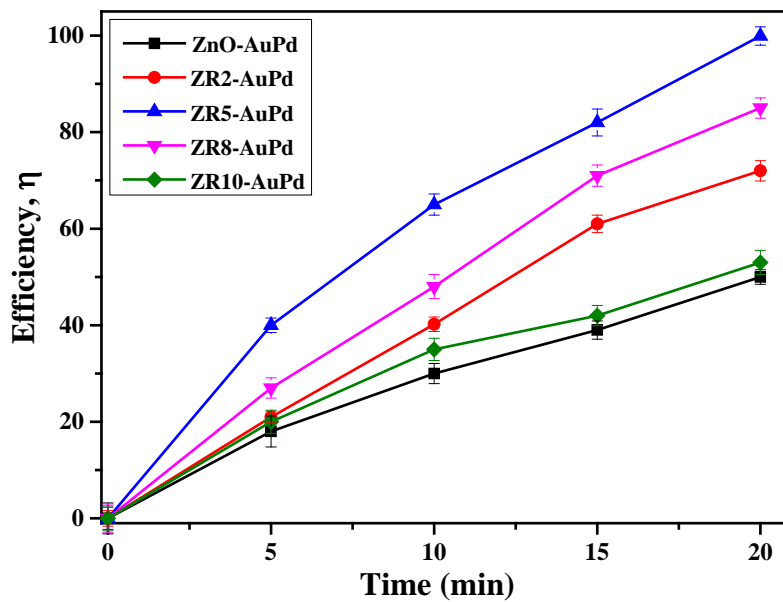

S7: Photocatalytic activity of ZnO-RGO-AuPd hybrid nanostructures with various (2-10) wt% of RGO.

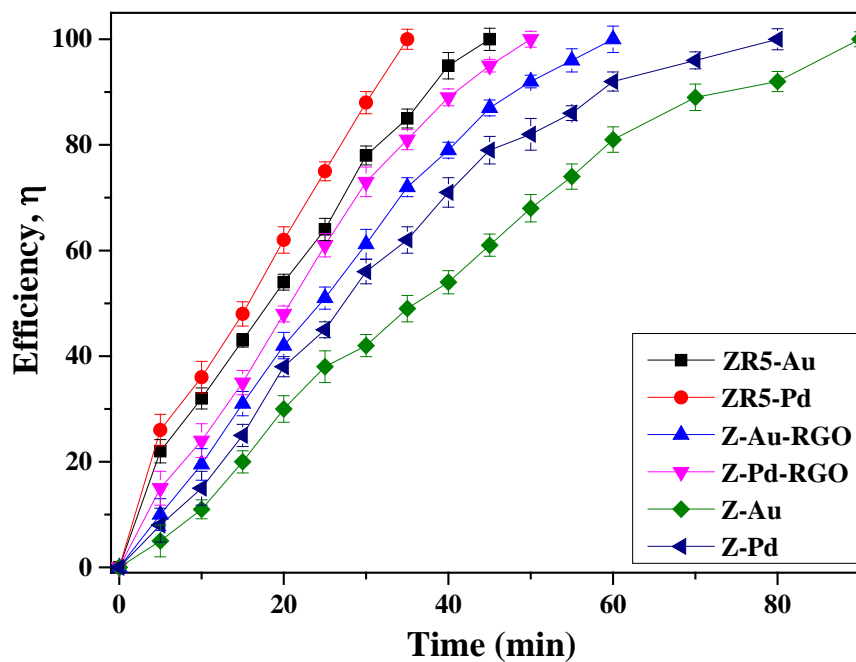

S8: Photocatalytic activity of different hybrid nanostructures.

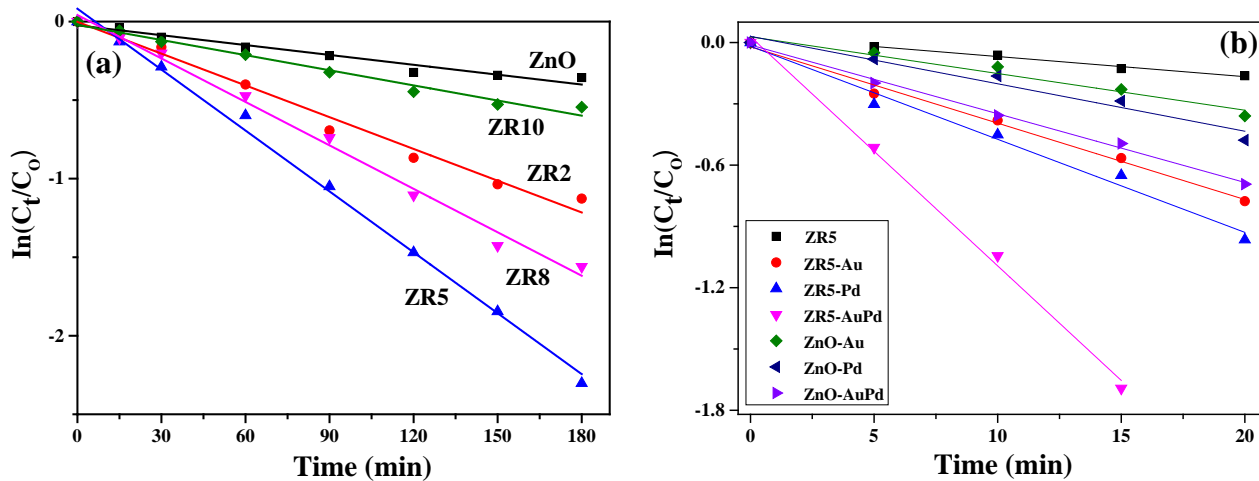

S9:  $\ln(C_t/C_0)$  vs time 't' plot for the kinetic studies of the reduction reaction of R6G dye.

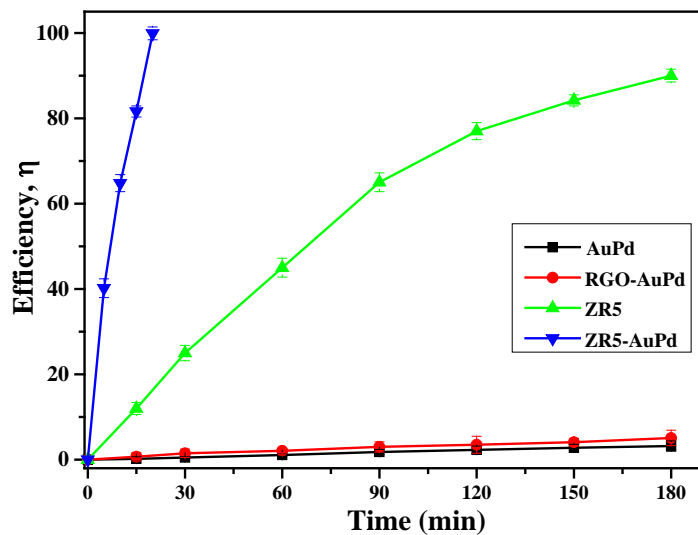

S10: Photocatalytic activity of AuPd, RGO-AuPd, ZR5 and ZR5-AuPd to degrade R6G dye.

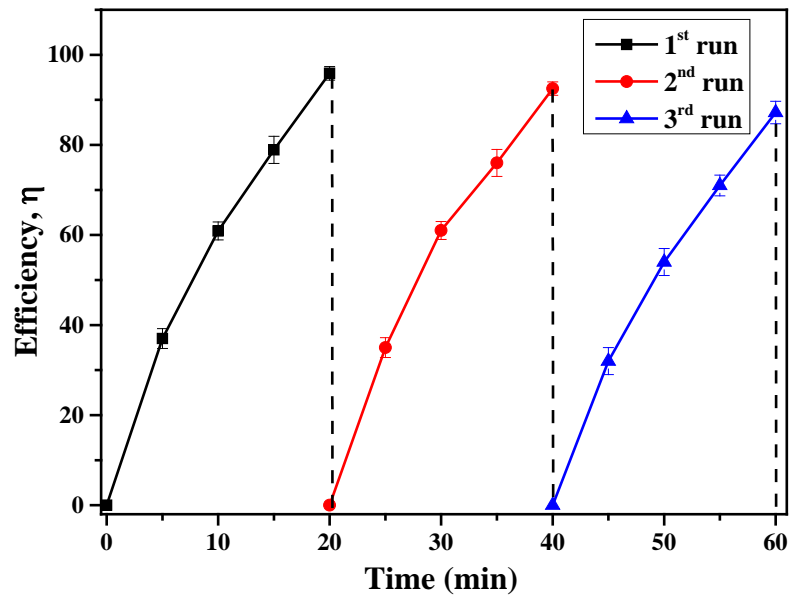

**S11:** Recycled photocatalytic activity of ZR5-AuPd photocatalyst towards degradation of R6G dye.
